# Supplementary material
Source: PubMed Central journal article supplement (PMC3056650)
Supplement: NIHMS271009-supplement-Supplementary_Materials.pdf [file NIHMS271009-supplement-Supplementary_Materials.pdf]

1 **Table S-1.** Experimental and multiple linear fit GC retention times for PBDE congeners

| PBDE number | Retention time exp (min) | Retention time fit (min) | Residual | PBDE number | Retention time exp (min) | Retention time fit (min) | Residual |
|-------------|--------------------------|--------------------------|----------|-------------|--------------------------|--------------------------|----------|
| BDE-1       | 10.92                    | 11.04                    | -0.12    | BDE-153     | 22.83                    | 23.20                    | -0.37    |
| BDE-2       | 11.12                    | 11.22                    | -0.10    | BDE-154     | 22.18                    | 22.59                    | -0.41    |
| BDE-3       | 11.32                    | 11.70                    | -0.38    | BDE-155     | 21.87                    | 22.29                    | -0.42    |
| BDE-7       | 13.87                    | 14.14                    | -0.27    | BDE-166     | 23.82                    | 23.85                    | -0.03    |
| BDE-8       | 14.15                    | 14.10                    | 0.05     | BDE-168     | 22.67                    | 23.56                    | -0.89    |
| BDE-10      | 13.25                    | 13.15                    | 0.10     | BDE-181     | 26.13                    | 25.63                    | 0.50     |
| BDE-11      | 14.15                    | 13.83                    | 0.32     | BDE-183     | 24.77                    | 25.10                    | -0.33    |
| BDE-12      | 14.33                    | 14.89                    | -0.56    | BDE-184     | 24.38                    | 24.97                    | -0.59    |
| BDE-13      | 14.33                    | 14.14                    | 0.19     | BDE-190     | 26.43                    | 26.32                    | 0.11     |
| BDE-15      | 14.62                    | 14.35                    | 0.27     | BDE-196     | 29.03                    | 28.11                    | 0.92     |
| BDE-17      | 16.52                    | 16.32                    | 0.20     | BDE-197     | 28.15                    | 27.65                    | 0.50     |
| BDE-25      | 16.58                    | 16.26                    | 0.32     |             |                          |                          |          |
| BDE-28      | 16.88                    | 16.57                    | 0.31     |             |                          |                          |          |
| BDE-30      | 15.62                    | 15.87                    | -0.25    |             |                          |                          |          |
| BDE-32      | 16.35                    | 16.06                    | 0.29     |             |                          |                          |          |
| BDE-33      | 16.88                    | 16.98                    | -0.10    |             |                          |                          |          |
| BDE-35      | 17.12                    | 16.99                    | 0.13     |             |                          |                          |          |
| BDE-37      | 17.37                    | 17.27                    | 0.10     |             |                          |                          |          |
| BDE-47      | 19.02                    | 18.66                    | 0.36     |             |                          |                          |          |
| BDE-49      | 18.67                    | 18.06                    | 0.61     |             |                          |                          |          |
| BDE-66      | 19.37                    | 19.32                    | 0.05     |             |                          |                          |          |
| BDE-71      | 18.78                    | 18.73                    | 0.05     |             |                          |                          |          |
| BDE-75      | 18.52                    | 18.39                    | 0.13     |             |                          |                          |          |
| BDE-77      | 19.87                    | 19.81                    | 0.06     |             |                          |                          |          |
| BDE-85      | 21.83                    | 21.42                    | 0.41     |             |                          |                          |          |
| BDE-99      | 21.02                    | 21.01                    | 0.01     |             |                          |                          |          |
| BDE-100     | 20.53                    | 20.37                    | 0.16     |             |                          |                          |          |
| BDE-116     | 21.23                    | 21.78                    | -0.55    |             |                          |                          |          |
| BDE-118     | 21.42                    | 21.58                    | -0.16    |             |                          |                          |          |
| BDE-119     | 20.73                    | 20.98                    | -0.25    |             |                          |                          |          |
| BDE-121     | 20.00                    | 20.20                    | -0.20    |             |                          |                          |          |
| BDE-126     | 22.02                    | 22.30                    | -0.28    |             |                          |                          |          |
| BDE-138     | 23.68                    | 23.81                    | -0.13    |             |                          |                          |          |
| BDE-140     | 23.22                    | 23.30                    | -0.08    |             |                          |                          |          |
| BDE-146     | 22.78                    | 22.74                    | 0.04     |             |                          |                          |          |
| BDE-148     | 22.17                    | 22.31                    | -0.14    |             |                          |                          |          |

3 **Table S-2.** Calculated reaction rate constants relative to BDE-209 for all the 209 PBDEs

| PBDE Number | relative $\sum k$ |
|-------------|-------------------|-------------|-------------------|-------------|-------------------|-------------|-------------------|-------------|-------------------|
| BDE1        | 9.25E-06          | BDE44       | 1.26E-03          | BDE87       | 7.34E-03          | BDE130      | 1.62E-02          | BDE173      | 1.46E-01          |
| BDE2        | 5.80E-07          | BDE45       | 1.58E-03          | BDE88       | 1.04E-02          | BDE131      | 1.97E-02          | BDE174      | 5.15E-02          |
| BDE3        | 7.98E-07          | BDE46       | 1.36E-03          | BDE89       | 7.00E-03          | BDE132      | 1.40E-02          | BDE175      | 3.65E-02          |
| BDE4        | 3.03E-05          | BDE47       | 1.23E-04          | BDE90       | 2.77E-03          | BDE133      | 1.10E-02          | BDE176      | 3.14E-02          |
| BDE5        | 4.79E-04          | BDE48       | 4.05E-04          | BDE91       | 1.87E-03          | BDE134      | 1.66E-02          | BDE177      | 3.46E-02          |
| BDE6        | 1.47E-05          | BDE49       | 1.35E-04          | BDE92       | 3.70E-03          | BDE135      | 9.47E-03          | BDE178      | 3.01E-02          |
| BDE7        | 3.46E-05          | BDE50       | 2.27E-04          | BDE93       | 8.90E-03          | BDE136      | 7.69E-03          | BDE179      | 2.80E-02          |
| BDE8        | 1.10E-05          | BDE51       | 1.49E-04          | BDE94       | 3.95E-03          | BDE137      | 2.66E-02          | BDE180      | 4.56E-02          |
| BDE9        | 2.88E-05          | BDE52       | 1.43E-04          | BDE95       | 2.48E-03          | BDE138      | 1.03E-02          | BDE181      | 1.16E-01          |
| BDE10       | 3.35E-05          | BDE53       | 1.59E-04          | BDE96       | 2.65E-03          | BDE139      | 1.39E-02          | BDE182      | 3.84E-02          |
| BDE11       | 2.18E-06          | BDE54       | 1.80E-04          | BDE97       | 1.95E-03          | BDE140      | 9.07E-03          | BDE183      | 2.48E-02          |
| BDE12       | 5.63E-05          | BDE55       | 4.67E-03          | BDE98       | 1.72E-03          | BDE141      | 3.27E-02          | BDE184      | 2.17E-02          |
| BDE13       | 2.12E-06          | BDE56       | 9.42E-04          | BDE99       | 5.94E-04          | BDE142      | 8.47E-02          | BDE185      | 1.43E-01          |
| BDE14       | 4.60E-06          | BDE57       | 2.21E-03          | BDE100      | 3.19E-04          | BDE143      | 2.88E-02          | BDE186      | 1.24E-01          |
| BDE15       | 2.27E-06          | BDE58       | 1.13E-03          | BDE101      | 6.94E-04          | BDE144      | 1.77E-02          | BDE187      | 1.72E-02          |
| BDE16       | 8.05E-04          | BDE59       | 1.46E-03          | BDE102      | 6.31E-04          | BDE145      | 1.63E-02          | BDE188      | 1.71E-02          |
| BDE17       | 7.17E-05          | BDE60       | 3.63E-03          | BDE103      | 3.85E-04          | BDE146      | 5.07E-03          | BDE189      | 5.93E-02          |
| BDE18       | 6.98E-05          | BDE61       | 1.40E-02          | BDE104      | 4.20E-04          | BDE147      | 1.03E-02          | BDE190      | 1.40E-01          |
| BDE19       | 7.98E-05          | BDE62       | 6.76E-03          | BDE105      | 6.30E-03          | BDE148      | 4.74E-03          | BDE191      | 3.17E-02          |
| BDE20       | 7.31E-04          | BDE63       | 1.63E-03          | BDE106      | 2.30E-02          | BDE149      | 3.56E-03          | BDE192      | 1.69E-01          |
| BDE21       | 2.82E-03          | BDE64       | 1.07E-03          | BDE107      | 7.85E-03          | BDE150      | 3.31E-03          | BDE193      | 2.06E-02          |
| BDE22       | 5.37E-04          | BDE65       | 5.45E-03          | BDE108      | 1.14E-02          | BDE151      | 1.38E-02          | BDE194      | 1.49E-01          |
| BDE23       | 1.44E-03          | BDE66       | 1.63E-04          | BDE109      | 2.72E-03          | BDE152      | 1.46E-02          | BDE195      | 2.23E-01          |
| BDE24       | 9.49E-04          | BDE67       | 4.45E-04          | BDE110      | 1.82E-03          | BDE153      | 1.64E-03          | BDE196      | 1.05E-01          |
| BDE25       | 5.33E-05          | BDE68       | 8.87E-05          | BDE111      | 3.42E-03          | BDE154      | 1.04E-03          | BDE197      | 7.23E-02          |
| BDE26       | 4.55E-05          | BDE69       | 1.90E-04          | BDE112      | 8.43E-03          | BDE155      | 7.09E-04          | BDE198      | 2.54E-01          |
| BDE27       | 5.16E-05          | BDE70       | 1.71E-04          | BDE113      | 2.26E-03          | BDE156      | 3.18E-02          | BDE199      | 1.04E-01          |
| BDE28       | 3.99E-05          | BDE71       | 1.47E-04          | BDE114      | 1.90E-02          | BDE157      | 1.44E-02          | BDE200      | 2.16E-01          |
| BDE29       | 2.75E-04          | BDE72       | 8.00E-05          | BDE115      | 9.01E-03          | BDE158      | 1.57E-02          | BDE201      | 7.14E-02          |
| BDE30       | 1.25E-04          | BDE73       | 8.58E-05          | BDE116      | 5.92E-02          | BDE159      | 3.82E-02          | BDE202      | 6.84E-02          |
| BDE31       | 3.36E-05          | BDE74       | 3.70E-04          | BDE117      | 6.24E-03          | BDE160      | 9.95E-02          | BDE203      | 2.00E-01          |
| BDE32       | 3.75E-05          | BDE75       | 1.41E-04          | BDE118      | 7.79E-04          | BDE161      | 1.96E-02          | BDE204      | 1.69E-01          |
| BDE33       | 8.63E-05          | BDE76       | 1.76E-03          | BDE119      | 3.47E-04          | BDE162      | 8.32E-03          | BDE205      | 2.47E-01          |
| BDE34       | 2.77E-05          | BDE77       | 2.79E-04          | BDE120      | 7.40E-04          | BDE163      | 1.00E-02          | BDE206      | 4.51E-01          |
| BDE35       | 9.63E-05          | BDE78       | 2.40E-03          | BDE121      | 2.98E-04          | BDE164      | 5.81E-03          | BDE207      | 3.51E-01          |
| BDE36       | 1.07E-05          | BDE79       | 1.74E-04          | BDE122      | 4.02E-03          | BDE165      | 1.31E-02          | BDE208      | 3.97E-01          |
| BDE37       | 8.46E-05          | BDE80       | 3.25E-05          | BDE123      | 2.59E-03          | BDE166      | 8.18E-02          | BDE209      | 1.00E+0           |
| BDE38       | 1.52E-03          | BDE81       | 2.19E-03          | BDE124      | 2.84E-03          | BDE167      | 4.98E-03          |             |                   |
| BDE39       | 8.95E-06          | BDE82       | 8.60E-03          | BDE125      | 2.09E-03          | BDE168      | 3.23E-03          |             |                   |
| BDE40       | 2.38E-03          | BDE83       | 5.40E-03          | BDE126      | 3.69E-03          | BDE169      | 1.10E-02          |             |                   |
| BDE41       | 4.43E-03          | BDE84       | 4.30E-03          | BDE127      | 3.83E-03          | BDE170      | 6.03E-02          |             |                   |
| BDE42       | 9.55E-04          | BDE85       | 5.71E-03          | BDE128      | 1.89E-02          | BDE171      | 3.82E-02          |             |                   |
| BDE43       | 2.38E-03          | BDE86       | 1.98E-02          | BDE129      | 3.46E-02          | BDE172      | 6.06E-02          |             |                   |

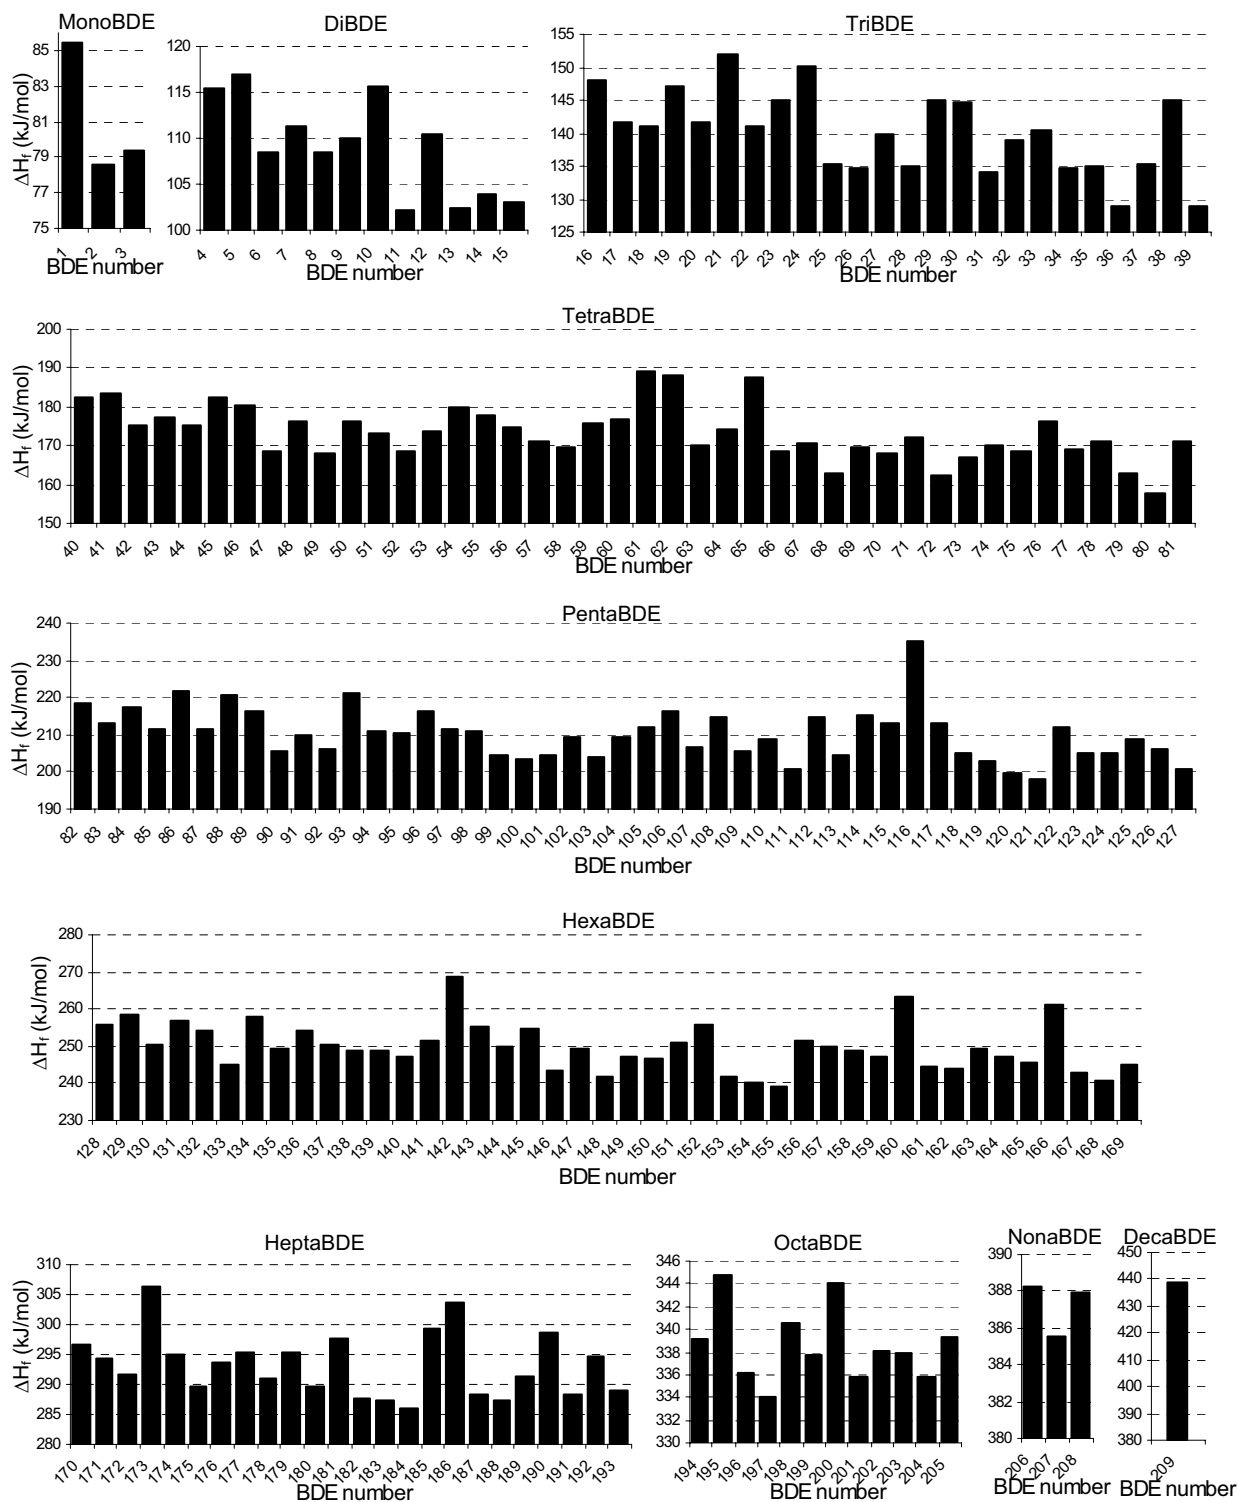

4  
5 **Figure S-1.** Enthalpy of formation of 209 PBDEs calculated using the GAM model [1].

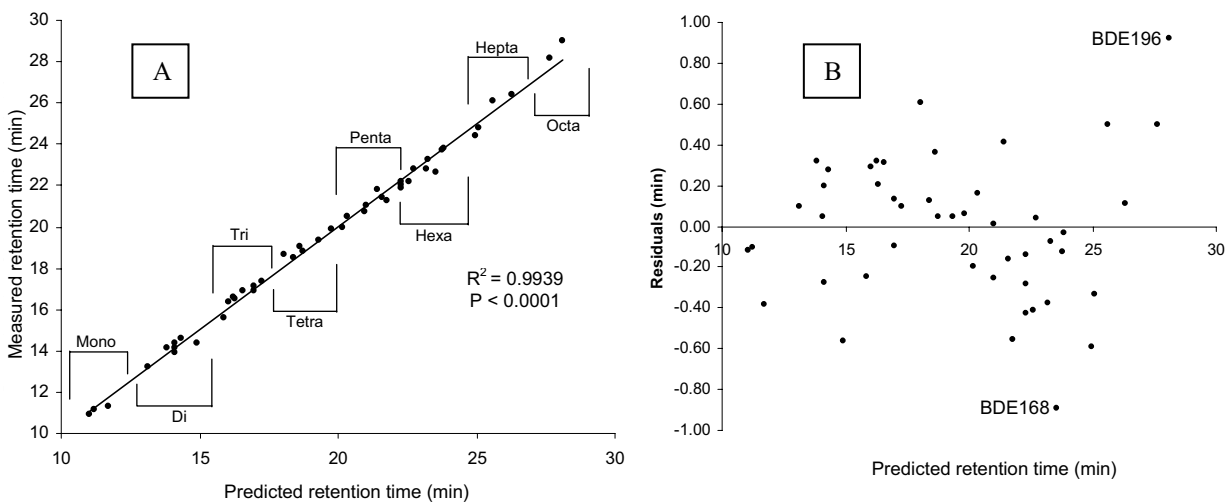

6

7 **Figure S-2.** Correlation between measured and predicted GC retention time (A) and plot of  
8 residuals (B).

9

10

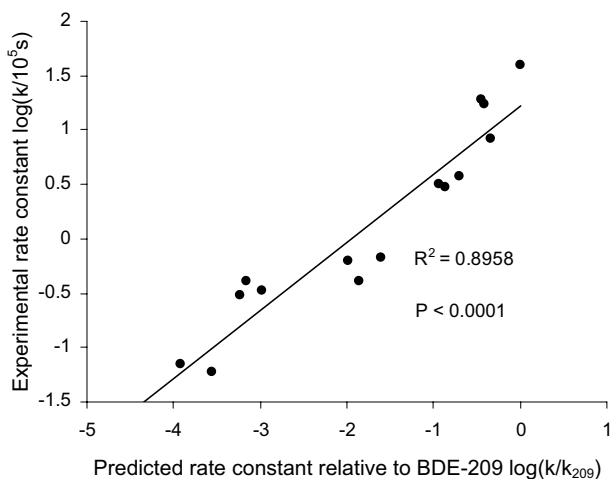

11

12 **Figure S-3.** Correlation between predicted photodegradation rates (relative to BDE-209) and  
13 experimental rates [2].

14

15

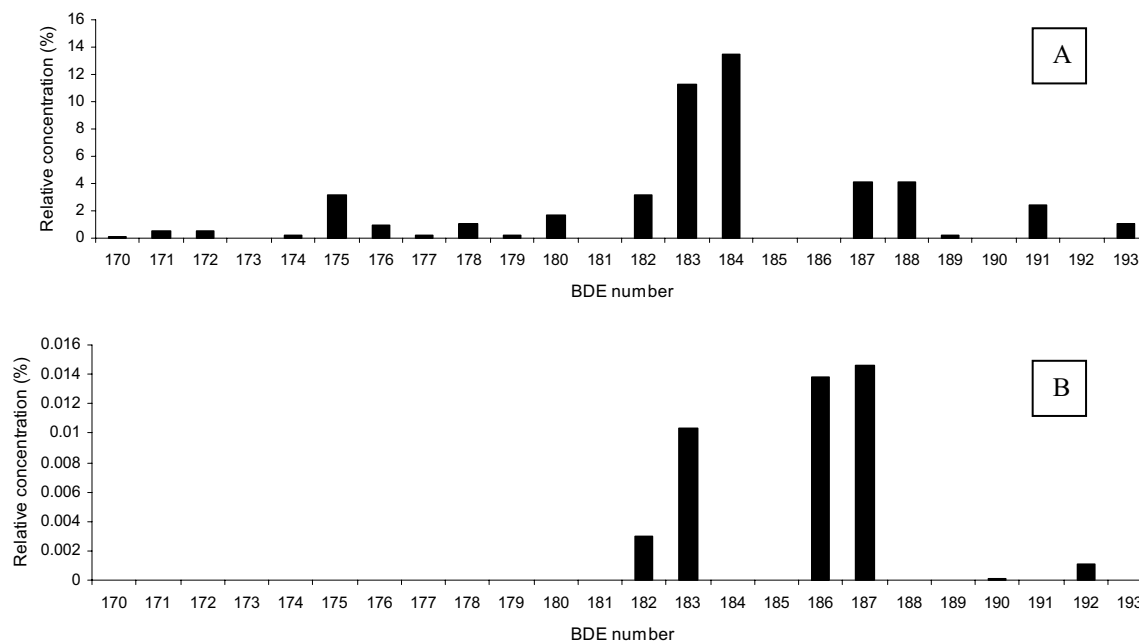

16

17 **Figure S-4.** Predicted hepta-BDE products from BDE-209 photodegradation in methanol/water  
18 (80/20) and UV light. A is the product profile at  $1 \times 10^5$  sec reaction time and B is the product  
19 profile at  $1.4 \times 10^6$  sec. The concentrations are relative to the total BDE concentration.

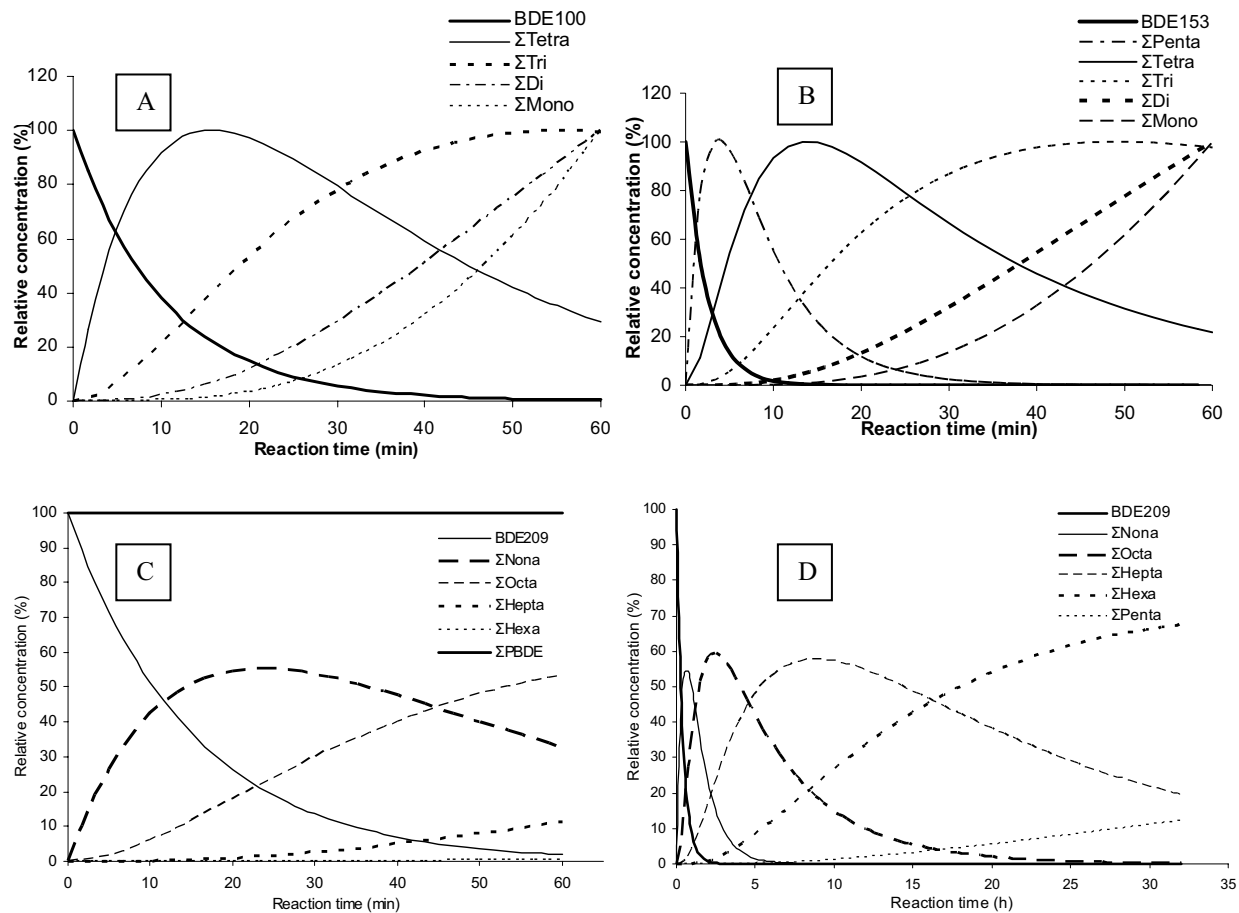

20

21 **Figure S-5.** Predicted PBDE photodegradation time profiles. A and B are the predicted  
 22 photodegradation of BDE-100 and BDE-153, respectively, after SPME fiber exposure to sunlight  
 23 simulated irradiation normalized to the maximum concentration of each homologous group [3].  
 24 C is the predicted solar photodecomposition of BDE-209 in hexane relative to total PBDE  
 25 concentration [4]. D is the predicted photodegradation of BDE-209 on silica gel under UV-light  
 26 relative to total PBDE concentration [5].

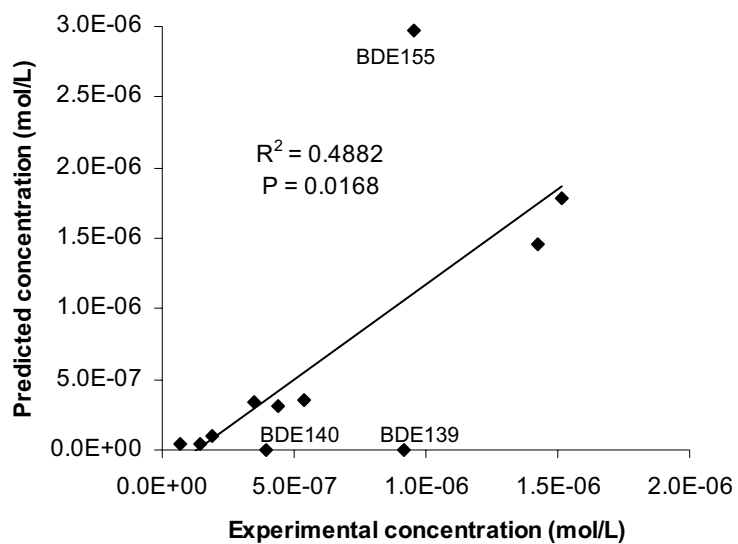

27

28 **Figure S-6.** Correlation between experimental concentration and model predicted concentration

29 for BDE-184 photodegradation products at 120 min.

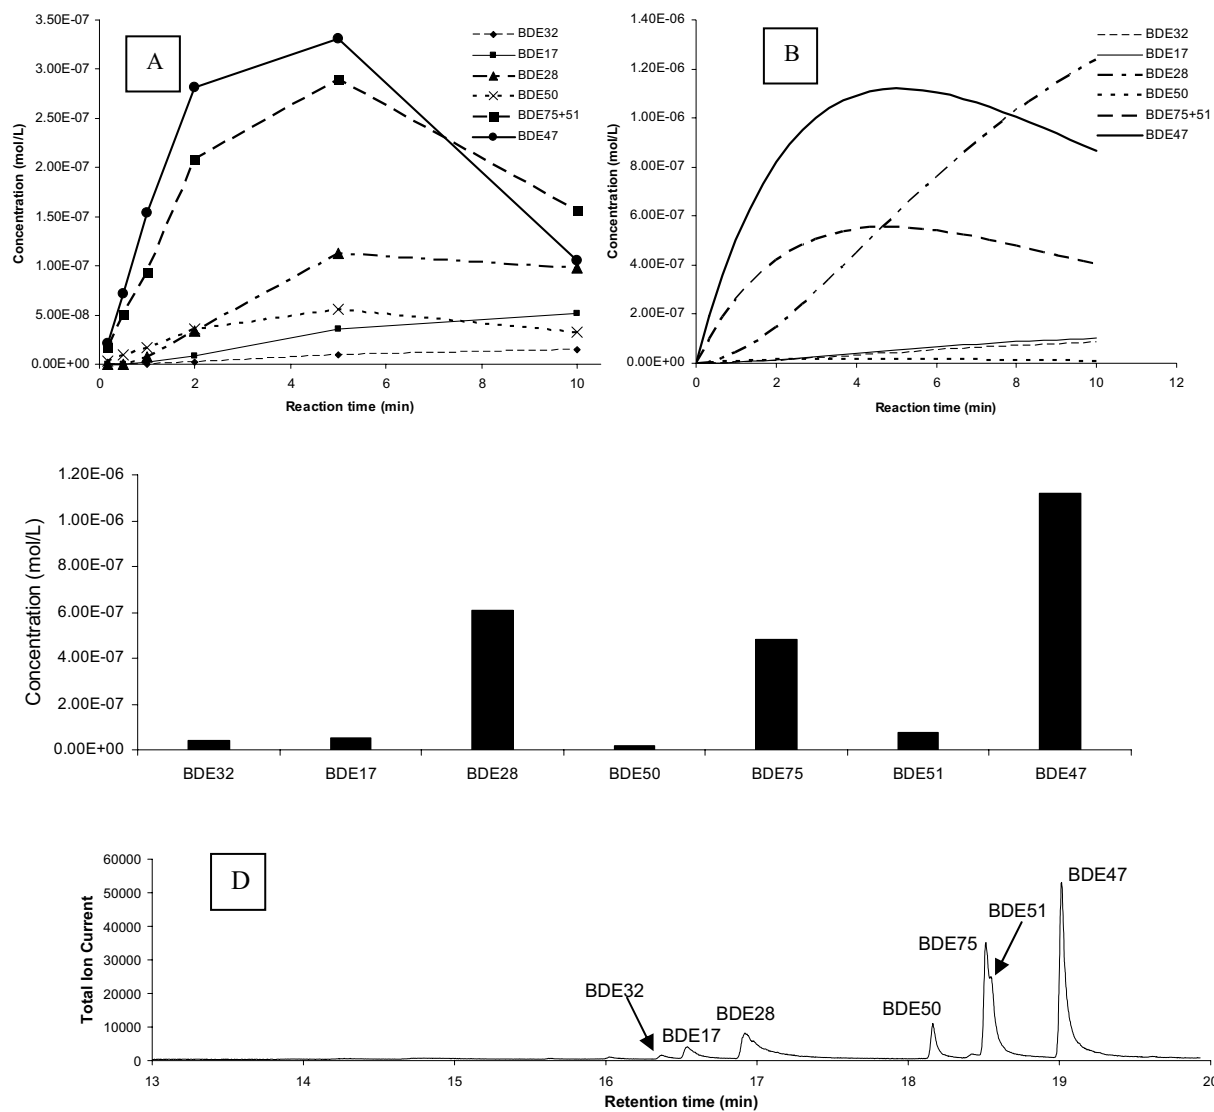

30

31 **Figure S-7.** Photodegradation of BDE-100 in isoctane under UV. A is the experimental results

32 and B is the model prediction for BDE-100. C is the model prediction and D is experimental

33 results of BDE-100 photodegradation at 5 min.

34



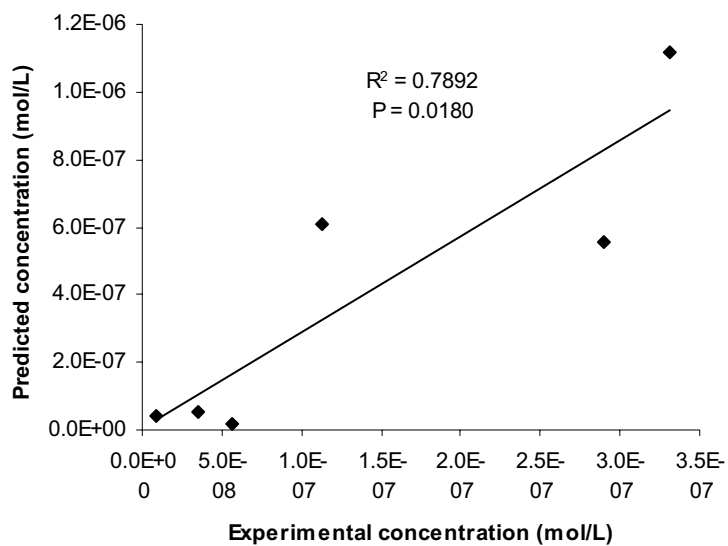

35

36 **Figure S-8.** Correlation between experimental result and model simulation for BDE-100

37 photodegradation products at 5 min.

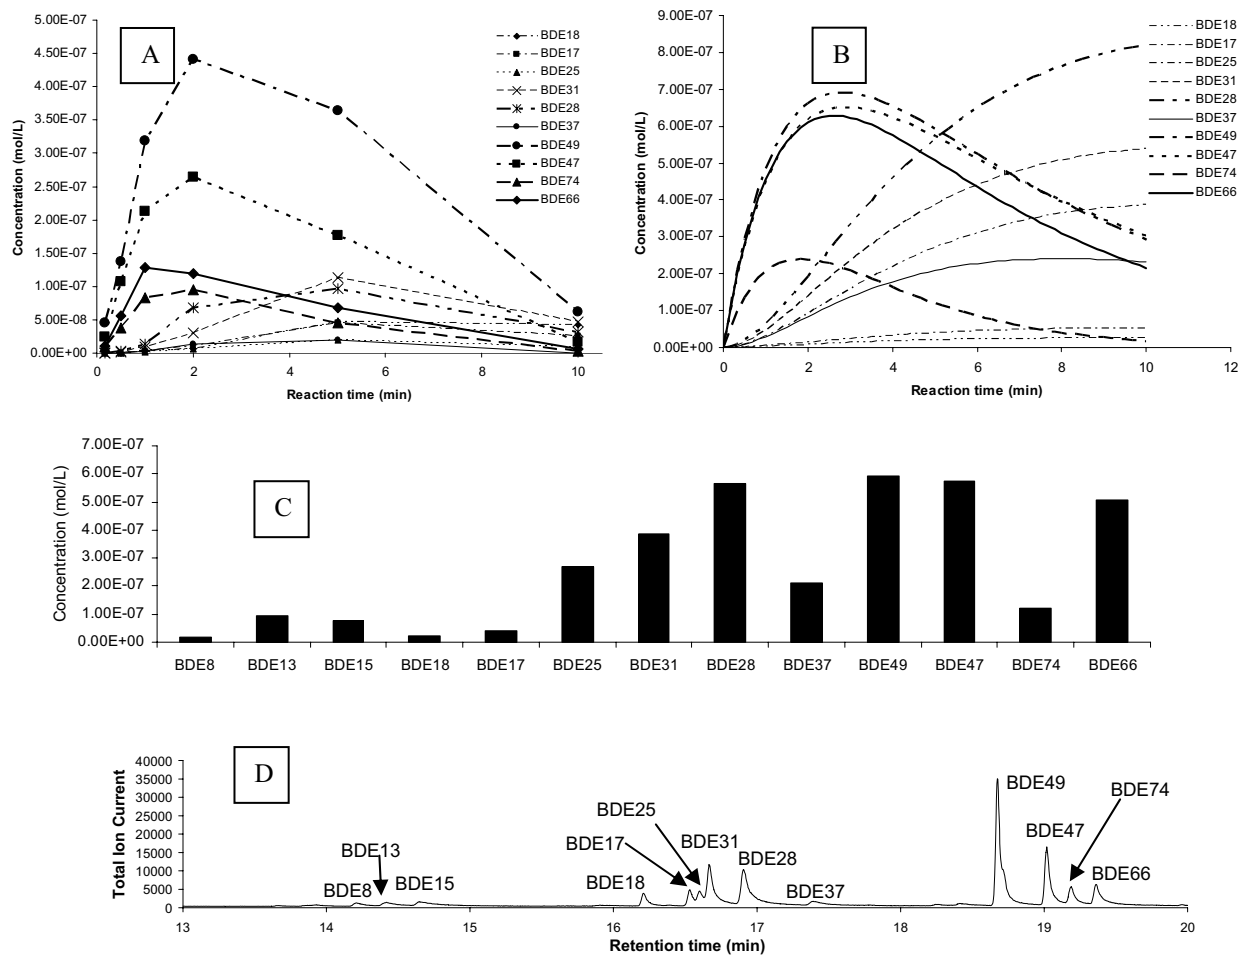

38  
 39 **Figure S-9.** Photodegradation of BDE-99 in isooctane under UV. A is the experimental results  
 40 and B is the model prediction for BDE-99. C is the model prediction and D is experimental  
 41 results of BDE-99 photodegradation at 5 min.

42

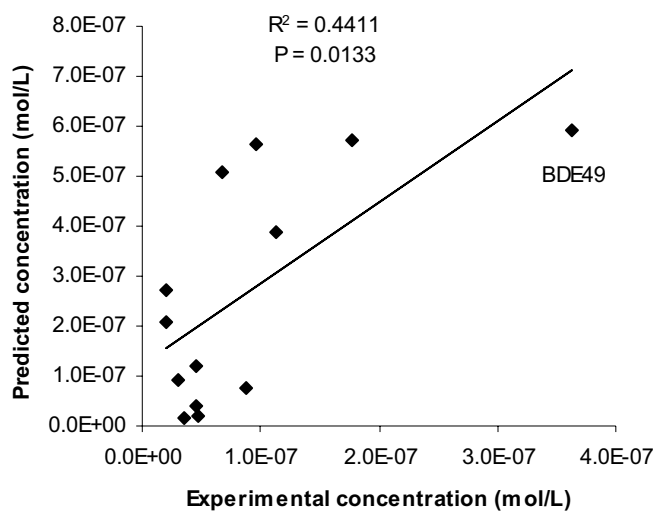

43

44 **Figure S-10.** Correlation between experimental result and model simulation for BDE-99

45 photodegradation products at 5 min.

46

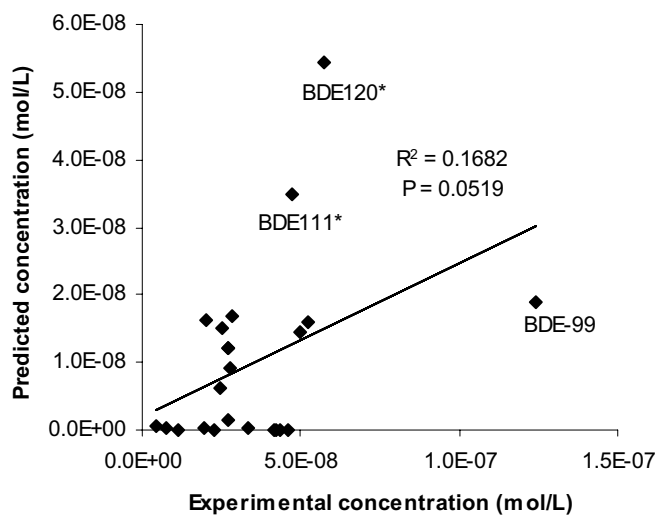

47

48 **Figure S-11.** Correlation between experimental result and model simulation for tetra-BDEs and

49 penta-BDEs in BDE-209 photodegradation products at 120 min.

50

51 **References**

- 52 1. Zeng X, Freeman PK, Vasil'ev YV, Voinov VG, Simonich SL, Barofsky DF. 2005.  
53 Theoretical Calculation of Thermodynamic Properties of Polybrominated Diphenyl  
54 Ethers. *Journal of Chemical and Engineering Data* 50:1548-1556.
- 55 2. Eriksson J, Green N, Marsh G, Bergman A. 2004. Photochemical Decomposition of 15  
56 Polybrominated Diphenyl Ether Congeners in Methanol/Water. *Environ Sci Technol*  
57 38:3119-3125.
- 58 3. Sanchez-Prado L, Lores M, Llompart M, Garcia-Jares C, Bayona JM, Cela R. 2006.  
59 Natural sunlight and sun simulator photolysis studies of tetra- to hexa-brominated  
60 diphenyl ethers in water using solid-phase microextraction. *J Chromatogr A* 1124:157-  
61 166.
- 62 4. Bezares-Cruz J, Jafvert CT, Hua I. 2004. Solar photodecomposition of  
63 decabromodiphenyl ether: products and quantum yield. *Environ Sci Technol* 38:4149-  
64 4156.
- 65 5. Soderstrom G, Sellstrom U, de Wit CA, Tysklind M. 2004. Photolytic debromination of  
66 decabromodiphenyl ether (BDE 209). *Environ Sci Technol* 38:127-132.

67

68
